# Supplementary material for: Spin-gapless van der Waals heterostructure for spin gating through magnetic injection devices
Source: Royal Society of Chemistry journal article supplement (doi:10.1039/d3cp00987d), 2023-01-01
Supplement: d3cp00987d1.pdf [file d3cp00987d1.pdf]

# Spin Gapless van der Waals Heterostructure for Spin Gating Through Magnetic Injection Device

Xiaolin Zhang,<sup>a</sup> Pengwei Gong,<sup>a</sup> Fangqi Liu,<sup>a</sup> Sicong Zhu<sup>a,\*</sup>

<sup>a</sup> Hubei Province Key Laboratory of Systems Science in Metallurgical Process, The State Key Laboratory for Refractories and Metallurgy, Collaborative Innovation Center for Advanced Steels, International Research Institute for Steel Technology, Wuhan University of Science and Technology, Wuhan 430081, China

\* Corresponding author: [sczhu@wust.edu.cn](mailto:sczhu@wust.edu.cn) (S. C. Zhu).

For the transition group metals, the typical  $U$ -values are generally about 3.0 eV, mostly between 2.0 and 4.0 eV. We have tested the  $\text{Cr}_2\text{NOF}$  structure with  $U$  values between 0 eV and 5 eV (Fig. S1), and it can be seen that the change in  $U$  value has little effect on the properties, and the system keeps its magnetic semiconductor properties. When  $U$  is greater than 3eV, the morphology of the energy band structure is almost constant, and based on this 3eV was chosen as the  $U$  value selected for this study.

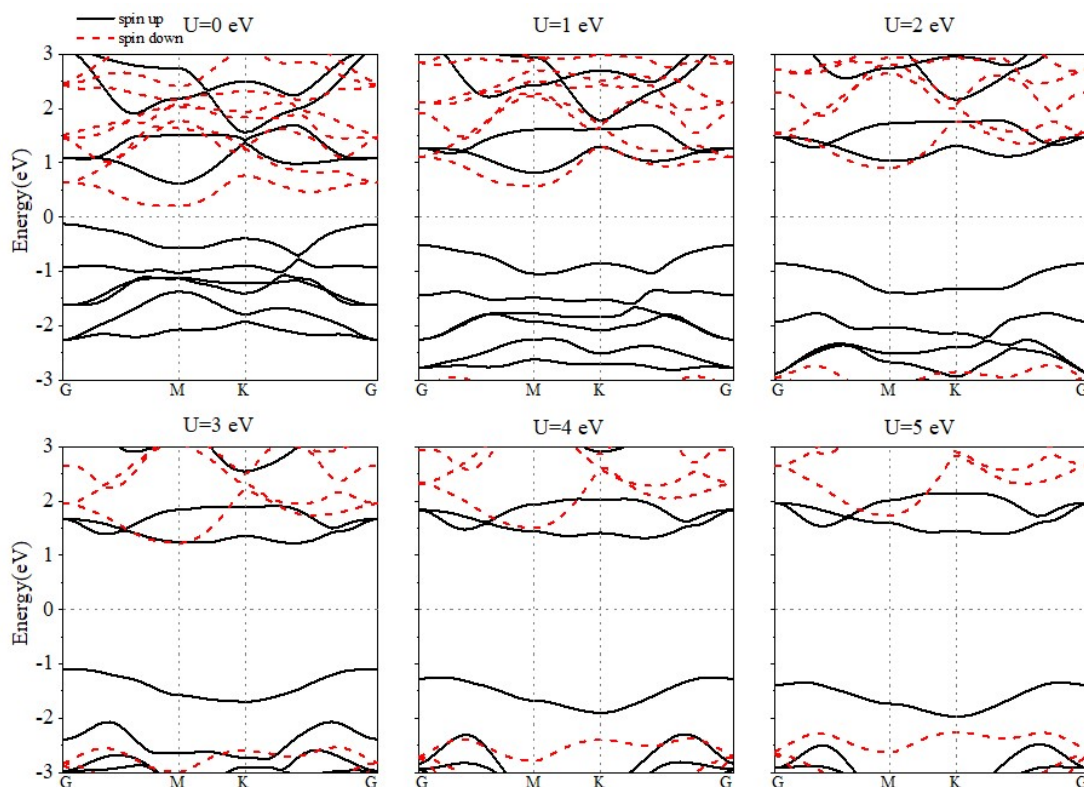

Fig. S1. Energy band structure of  $\text{Cr}_2\text{NOF}$  at different  $U$  values.

We compared the average binding energy per atom of  $\text{Cr}_2\text{NOF}$  with structures such as  $\text{Nb}_2\text{C}$ ,<sup>1</sup>  $\text{Ti}_2\text{C}$ ,<sup>2</sup> and  $\text{V}_2\text{C}$ .<sup>3</sup> For  $\text{Cr}_2\text{NOF}$ , the average binding energy per atom is -4.782 eV:

$$E_b = \frac{E_{Total} - 2E_{Cr} - E_N - E_O - E_F}{5} = -4.782 \text{ eV}$$

The binding energies of Nb<sub>2</sub>C, Ti<sub>2</sub>C, and V<sub>2</sub>C were calculated to be -3.67 eV, -4.08 eV, and -5.09 eV, respectively, and the binding energy of Cr<sub>2</sub>NOF lies between these synthesized 2D materials, indicating that it is stable.

Fig. S2 shows a schematic diagram of a lattice structure containing four different heterostructures, the mode of construction is the O-side and 2DH contact of Cr<sub>2</sub>NOF.

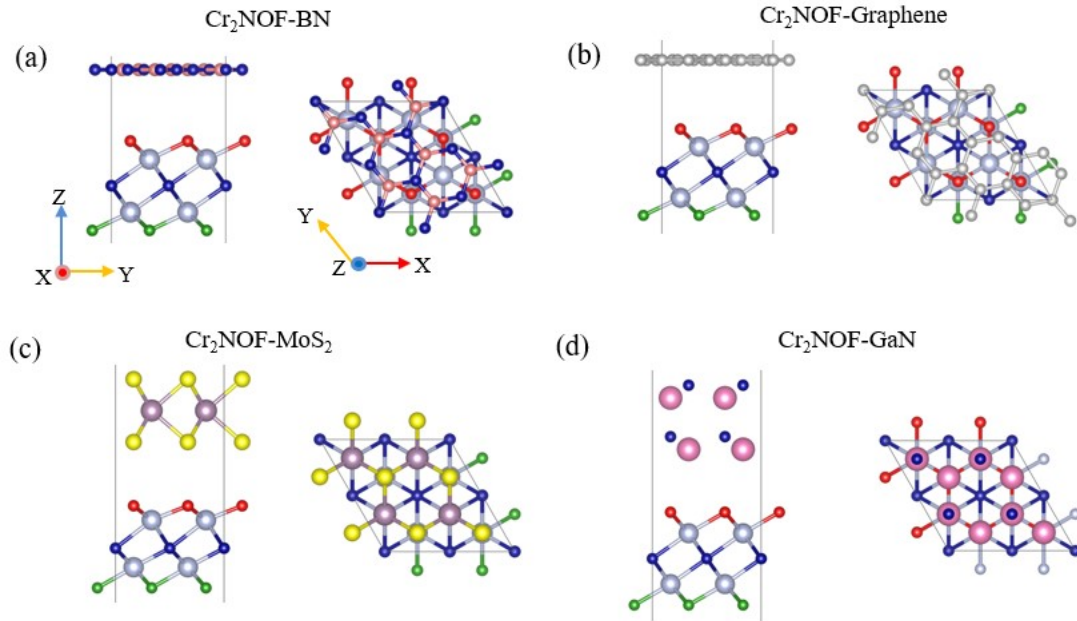

Fig. S2. Schematic illustration of the crystal structures of (a) Cr<sub>2</sub>NFO/BN, (b) Cr<sub>2</sub>NFO/Graphene, (c) Cr<sub>2</sub>NFO/MoS<sub>2</sub>, (d) Cr<sub>2</sub>NFO/GaN vdW heterostructures.

Fig. S3 shows the work function of Cr<sub>2</sub>NOF (F-side) contact with 2DH in heterojunction Cr<sub>2</sub>NFO/2DH. Due to the high original work function of 6.64 eV at the O-side, the O-side is exposed on the outside in this construction, resulting in a high work function on the right side of the four heterojunctions.

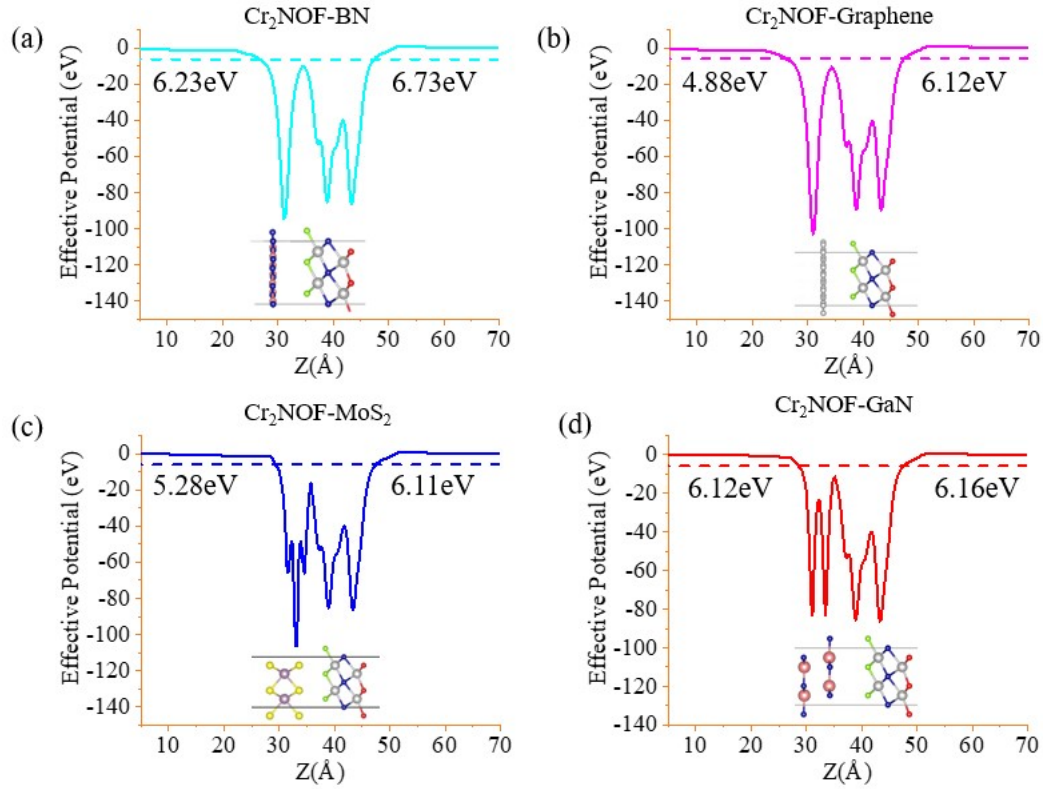

Fig. S3. The plane-averaged electrostatic potential difference of  $\text{Cr}_2\text{NOF}$  after the formation of (a)  $\text{Cr}_2\text{NOF}/\text{BN}$ , (b)  $\text{Cr}_2\text{NOF}/\text{Graphene}$ , (c)  $\text{Cr}_2\text{NOF}/\text{MoS}_2$ , (d)  $\text{Cr}_2\text{NOF}/\text{GaN}$  heterostructures. The inserts show the crystal structure of four heterojunctions in contact with the F-side.

We also calculate the fat band structures for the 2DH and F-side contact heterojunctions (Fig. S4). The BN contribution in  $\text{Cr}_2\text{NOF}/\text{BN}$  is biased towards deeper energy levels, with a larger band gap compared to the O-side contact case. The Dirac cone in  $\text{Cr}_2\text{NOF}/\text{Graphene}$  does not undergo a significant upward shift and remains near the Fermi level. There is no significant difference between the band structure of the  $\text{Cr}_2\text{NOF}/\text{GaN}$  heterojunction for the F-side contact and that of the O-side contact.

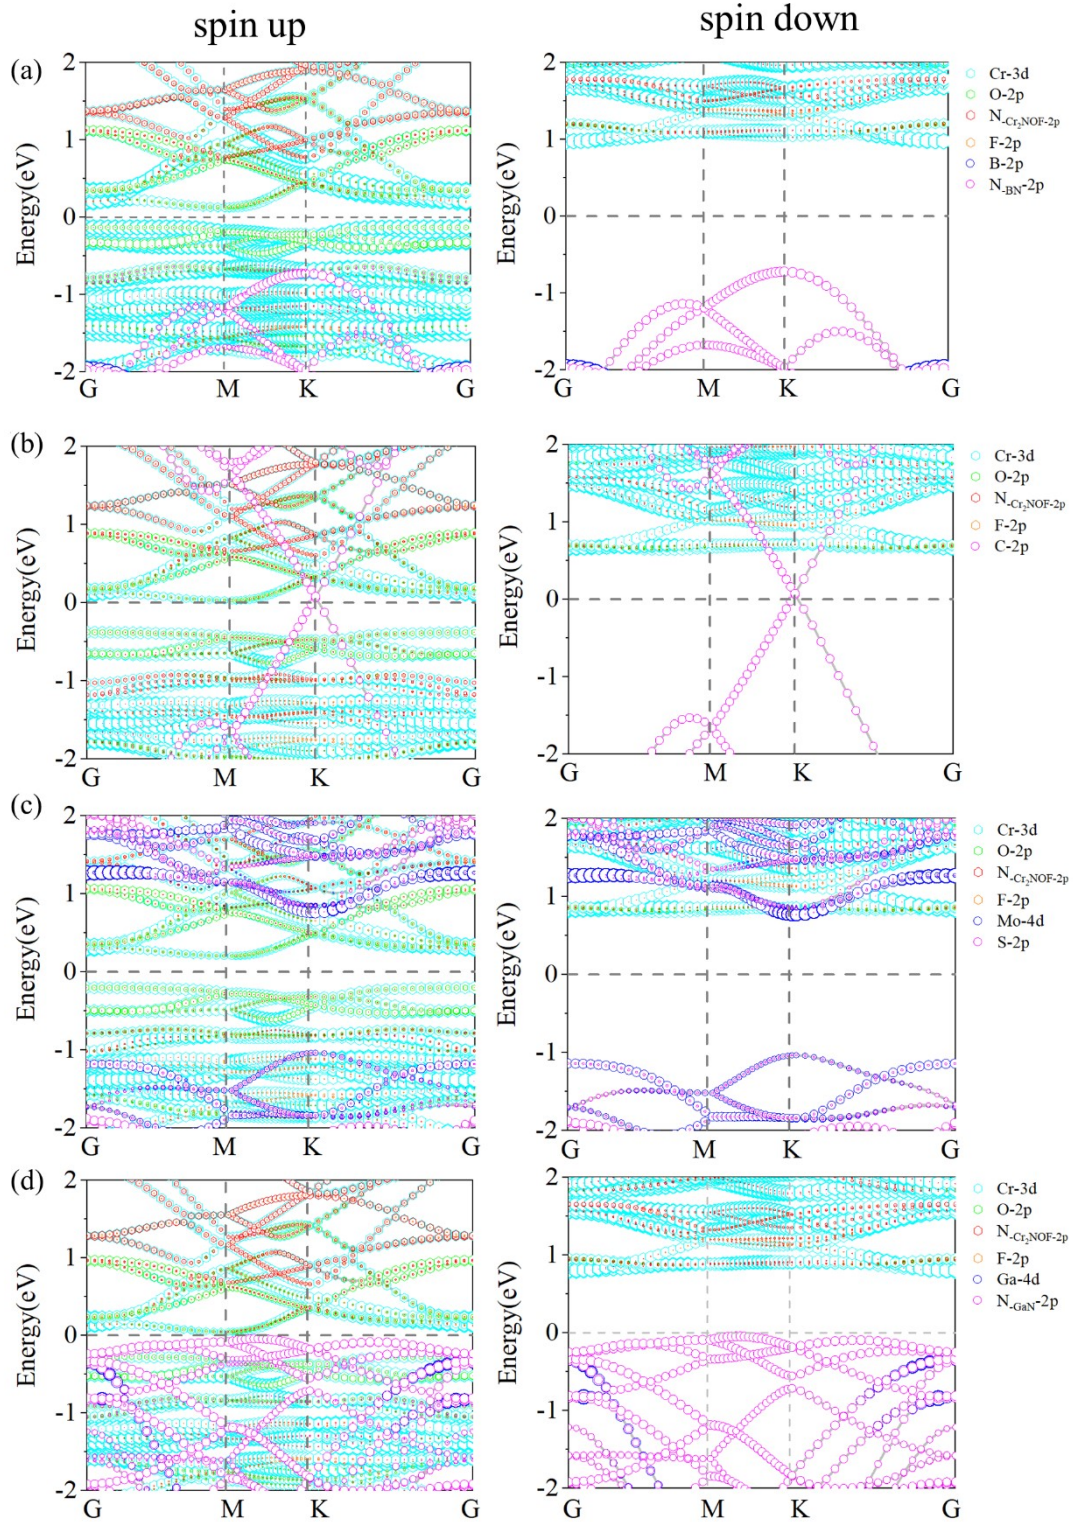

Fig. S4. The spin-polarized band structures of (a)  $\text{Cr}_2\text{NOF}/\text{BN}$ , (b)  $\text{Cr}_2\text{NOF}/\text{Graphene}$ , (c)  $\text{Cr}_2\text{NOF}/\text{MoS}_2$ , and (d)  $\text{Cr}_2\text{NOF}/\text{GaN}$  heterostructures. This is the case that 2DH and  $\text{Cr}_2\text{NOF}$  (F-side) contacts.

## References

1. O. Mashtalir, M. R. Lukatskaya, M. Q. Zhao, M. W. Barsoum, and Y. Gogotsi, *Adv.*

*Mater*, 2015, **27(23)**, 3501-3506.

2. A. Rozmysłowska-Wojciechowska, T. Wojciechowski, W. Ziemkowska, L. Chlubny, A. Olszyna and A. M. Jastrzębska, *Applied Surface Science*, 2019, **473**, 409-418.

3. X. Ning, S. Tang, Z. Jiao, Y. Yang and T. Liu, *ACS Applied Nano Materials*, 2022, **5**, 18357-18364.
